# Supplementary material
Source: PubMed Central journal article supplement (PMC4183345)
Supplement: pnas.201409730SI.pdf [file pnas.201409730SI.pdf]

# Supporting Information

Hamada et al. 10.1073/pnas.1409730111

## SI Materials and Methods

**Materials.** All-trans retinoic acid (RA), *N,N*-dimethylated casein, 2-aminoethoxydiphenyl borate (2-APB), and  $\alpha$ actin antibodies were purchased from Sigma-Aldrich. Zwittergent 3–14, ionomycin, and calpain I from porcine erythrocytes were purchased from Calbiochem. The enhanced chemiluminescence (ECL) reagents and HRP-conjugated streptavidin were purchased from GE Healthcare. The 5-biotinamido-pentylamine (BP), bis[sulfosuccinimidyl] suberate (BS), 1,8-bis-maleimido-diethyleneglycol (BM), Tris(2-carboxyethyl)phosphine (TCEP), and avidin proteins (NeutrAvidin) were purchased from Thermo Scientific. Inositol 1,4,5-trisphosphate (IP<sub>3</sub>), fura-2, and fura-2 acetoxymethyl ester (AM) were purchased from Dojindo. The  $\alpha$  transglutaminase type 2 ( $\alpha$ TG2) antibody (transglutaminase II Ab-1, CUB 7402) was purchased from LabVision.  $\alpha$ LC3 was purchased from Medical & Biological Laboratories (MBL, Japan). Purified guinea pig TG2, bovine thyroglobulin, xestospongine C (xest), and lysyl-endopeptidase (Lep) were purchased from Wako Pure Chemical. DMEM, penicillin–streptomycin mixed solution, acetonitrile for HPLC (HPLC), dimethyl sulfoxide (DMSO), and Triton X-100 were purchased from Nacalai. Ethanol was purchased from Junsei. FBS was purchased from Equitech-Bio. Tetramethylrhodamine cadaverine (TMR-cad) and pcDNA3.1 were purchased from Invitrogen. The site-specific inhibitor of TG2, Z-DON–Val–Pro–Leu–OMe (ZDON), was purchased from Zedira. The F(ab')<sub>2</sub> fragment of rabbit anti-human IgM was purchased from Jackson ImmunoResearch. Human neuroblastoma SH-SY5Y, human gliocytoma U87-MG, and mouse neuroblastoma Neuro2a cells were purchased from the American Type Culture Collection. PC12 cells with an inducible expression of full-length huntingtin (Htt) containing 145 polyglutamine repeats (Htt145Q–RFP) and plasmids containing full-length Htt and 23 (Htt23Q–myc) or 145 polyglutamines (Htt145Q–myc) were obtained from Coriell Institute.

**Cell Culture.** PC12 cells were seeded in collagen IV-coated 6-cm dishes and cultured in DMEM containing 15% (vol/vol) horse serum (Gibco), 2.5% (vol/vol) FBS, 100 U/mL penicillin, 100  $\mu$ g/mL streptomycin, 0.1 mg/mL zeocin (InvivoGen), and 0.1 mg/mL G418 (Nacalai). Neuro2A inducibly expressing Htt exon1 with polyQ (eHtt16Q– or eHtt150Q–EGFP) was cultured in DMEM containing 10% (vol/vol) heat-inactivated FBS, 50 U/mL penicillin, and 50  $\mu$ g/mL streptomycin, 0.4 mg/mL zeocin, and 0.2 mg/mL G418 (Nacalai) and routinely differentiated by treatment with 5 mM dbc AMP (Nacalai) (1). Expression of eHtt16Q– or eHtt150Q–EGFP was induced by adding 1  $\mu$ M ponasterone A (pon A, Invitrogen) to the culture medium. All cells were maintained in 5% (vol/vol) CO<sub>2</sub> at 37 °C.

**Chemical Cross-Linking of IP<sub>3</sub>R1.** Chemical cross-linking between IP<sub>3</sub> receptor type 1 (IP<sub>3</sub>R1) subunits was initiated by incubation of the P2/P3 fractions (1.5 mg/mL) in a reaction buffer containing 25 mM Hepes–NaOH, pH 7.5, 75 mM NaCl, 1 mM TCEP, 0.5 mM EDTA, and BS. SDS sample buffer was added, and the samples were incubated for 30 min on ice to terminate the reaction; the resulting samples were subjected to agarose gel electrophoresis (AGE) analysis. The membranes of the P2/P3 fractions were solubilized in 1% (wt/vol) detergents and then centrifuged at 20,000  $\times$  *g* for 15 min at 4 °C. A solution of 500  $\mu$ M BS was added to the solubilized fraction, followed by incubation on ice for 30 min.

**Fractionation of Endogenous Cross-Linking Activity.** The supernatant fraction obtained after ultracentrifugation of the homogenates was applied onto an anion exchanger column (TSKgel BioAssist Q, 50 mm  $\times$  4.6 mm i.d., Tosoh) that was pre-equilibrated with 10 mM Tris buffer (pH 7.5) containing 50 mM NaCl. The fractions containing cross-linking activity were eluted using a linear gradient from 50 to 750 mM NaCl at a flow rate of 1 mL/min. A total of 20–30 fractions (1 mL each) were collected to estimate cross-linking activity.

**Analysis of IP<sub>3</sub>R1 Cross-Linking in SH-SY5Y and U87-MG Cells.** Human SH-SY5Y or U87-MG cells harvested with scrapers from 3.5-cm dishes were heated at 55 °C for 15 min, followed by sonication twice for 5 s each. The resulting samples were subjected to AGE, and human IP<sub>3</sub>R1 was detected with 4C11.

**Immunocytochemistry.** We plated cells on sterilized coverslips and transfected siRNA or expression vectors. The cells were fixed in 3% (wt/vol) paraformaldehyde for more than 15 min and were then treated with 50 mM NH<sub>4</sub>Cl in PBS for 10 min. After washing the cells twice, we permeabilized them by incubation with 50  $\mu$ g/mL digitonin in 0.1% gelatin–PBS for 10 min, as described previously (2). The cells were then incubated with  $\alpha$ -LC3 (1:1,000, MBL) and  $\alpha$ -LAMP1 (1:100, Santa Cruz Biotechnology, H4A3) for 1 h. After washing three times, we incubated the cells with AlexaFluor488–IgG and/or AlexaFluor594–IgG (1:1,000) for 1 h. After washing, we observed fluorescence signals under an FV1000 (Olympus).

**Limited Proteolysis.** Before digestion by calpain or Lep, the cerebellar membranes or TG2-treated membranes were washed with cross-linking buffer three times by centrifugation at 20,000  $\times$  *g* followed by resuspension. Digestion was initiated by incubation of the washed membrane with various concentrations of calpain or Lep at 37 °C. After the addition of 1/50th the volume of 100 mM CaCl<sub>2</sub> to the mixture, digestion by calpain was initiated.

**Analysis of Peptides and Isopeptides.** HPLC was performed on an HP1100 system (Agilent Technologies) equipped with a photodiode array UV detector. The resulting reaction mixture was injected onto a C<sub>8</sub> column (Superoctyl TSKgel, 100 mm  $\times$  2.0 mm i.d., 2- $\mu$ m resin, Tosoh) using a 10- or 200- $\mu$ L loop. The peptide was eluted using a linear gradient from 10% (vol/vol) to 50% (vol/vol) acetonitrile containing 0.1% TFA for 15 min at a flow rate of 200  $\mu$ L/min.

**Protein Assay.** The protein concentrations of the P2/P3 fractions, cytosol fractions, or purified enzymes were measured in a U-0080D photodiode array spectrophotometer (Hitachi) according to the Bradford method using BSA as a standard.

**Inactivation of TG2 by NEM or Boiling.** We inactivated TG2 as described previously (3). TG2 was incubated with 5 mM *N*-ethylmaleimide (NEM) in 20 mM Hepes–NaOH (pH 7.5) for 30 min at room temperature. The reaction was terminated by incubation with 5 mM DTT for 30 min at room temperature. The resulting mixture was successively passed through two spin columns (Bio-Rad) to remove free NEM. Inactive TG2 was also prepared by boiling for 5 min in 20 mM Hepes–NaOH (pH 7.5).

**Measurement of TG2 Activity.** TG2 activity was measured in an F-2500 fluorescence spectrometer (Hitachi) by monitoring the velocity of

the fluorescence increase during TG2-catalyzed incorporation of monodancyl-cadaverine into *N*, *N*-dimethylcasein (4).

**Measurement of TG2 Expression Level.** SH-SY5Y and HeLa cells harvested from 3.5-cm, 6-cm dishes, or 12-well plates were boiled for 3 min or heated at 55 °C for 15 min in SDS sample buffer and subjected to SDS/PAGE analysis. TG2s were detected using  $\alpha$ TG2 antibody (CUB 7402). Quantification of TG2 was performed by densitometric analysis of Western blots (WBs) using Image J software (National Institutes of Health).

**Analysis of Autophagosome Dynamics by Fluorescence Microscopy.** To track the fluorescent vesicles, time-lapse images were obtained on the FV1000D at 5-s intervals for 2.5 min using a 60 $\times$  oil-immersion objective lens; the images were analyzed with the Image J software. To obtain color-coded time-lapse images, we used the Z-code stack plug-in and Z-project on Image J.

**In Vitro Transamidation of IP<sub>3</sub>R1 by TG2.** The P2/P3 fraction was diluted with a transamidation buffer (pH 7.5) containing 50 mM Hepes–NaOH, 150 mM NaCl, 1 mM EGTA, and 2 mM TCEP. Transamidation by TG2 was performed by incubating the reaction mixture containing 1 mg/mL protein of cerebellar membrane, 2 mM CaCl<sub>2</sub>, and various concentrations of TG2 for 30 min at 37 °C. Transamidated IP<sub>3</sub>R was detected using 4C11 unless stated otherwise.

**In Vitro Deamidation of IP<sub>3</sub>R1 by TG2.** The P2/P3 fraction (1 mg/mL) from cerebella was incubated with TG2 (0, 1, 3, 10, 30, and 100 ng/mL) at 37 °C for 90 min in Hepes buffer containing 50 mM Hepes–NaOH, 150 mM NaCl, 1 mM EGTA, 3 mM CaCl<sub>2</sub>, and 2 mM TCEP.

**Transfection of Plasmids.** The plasmids for EGFP–IP<sub>3</sub>R1, EGFP–Q2746E, Htt23Q–myc, Htt145Q–myc, Htt exon1 including 18 polyglutamines (eHtt18Q–EGFP), eHtt60Q–EGFP, and eHtt150Q–EGFP were used to transfect COS-7, HeLa, or Neuro2a cells using FuGENE (Promega). Primary cultured rat striatal neurons were transfected with eHtt18Q–EGFP or eHtt150Q–EGFP using Lipofectamine LTX (Invitrogen).

**Measurement of Intracellular Ca<sup>2+</sup> in PC12 and Neuro2a Cells.** PC12 cells were seeded in poly-L-lysine-coated 3.5-cm glass-bottom dishes and cultured for 1 d in 2 mL of DMEM containing 15% (vol/vol) horse serum, 2.5% (vol/vol) FBS, 100 U/mL penicillin, 100  $\mu$ g/mL streptomycin, 0.1 mg/mL zeocin, and 0.1 mg/mL G418 (Nacalai). To induce the full-length Htt mutant in the PC12 cells, we added 10  $\mu$ M pon A to the medium. Neuro2a cells were seeded in 3.5-cm glass-bottom dishes and cultivated for 1 d

in 2 mL of DMEM containing 10% (vol/vol) FBS, 100 U/mL penicillin, and 100  $\mu$ g/mL streptomycin, and then transfected with Htt23Q–myc, Htt145Q–myc, eHtt18Q–EGFP, or eHtt150Q–EGFP using FuGENE. The 2 d after induction or transfection, we loaded fura-2AM into Neuro2a or PC12 cells by incubation with balanced salt solution (BSS) containing 5  $\mu$ M fura-2AM for 30 min at room temperature and evaluated intracellular concentration of Ca<sup>2+</sup> ([Ca<sup>2+</sup>]<sub>i</sub>) using AQUACOSMOS as described previously (5). To monitor Ca<sup>2+</sup> release from the endoplasmic reticulum (ER), Neuro2a or PC12 cells were perfused with Ca<sup>2+</sup>-free BSS for 2 min immediately before [Ca<sup>2+</sup>]<sub>i</sub> measurements. Induced expression of mutant Htt in PC12 cells was confirmed by fluorescence of RFP fused with carboxyl-terminus of Htt and also verified by WB using  $\alpha$ htt (clone EP867Y, Abcam). After Ca<sup>2+</sup> imaging, we particularly fixed Neuro2a cells with 3% (wt/vol) paraformaldehyde and immunostained them with  $\alpha$ myc (clone 9E10, Santa Cruz) to measure [Ca<sup>2+</sup>]<sub>i</sub> in only Neuro2a cells expressing Htt23Q–myc or Htt145Q–myc. The regions of interest (ROIs) were put within the  $\alpha$ myc-stained Neuro2a cells, and in the case of PC12 cells, ROIs were selected within the sites that responded to agonist stimuli in the presence of extracellular Ca<sup>2+</sup>. The primary cultures of striatal neurons were prepared and subjected to Ca<sup>2+</sup> imaging as described previously (6). For eHtt18Q–EGFP, eHtt60Q–EGFP, or eHtt150Q–EGFP overexpression, we measured [Ca<sup>2+</sup>]<sub>i</sub> in GFP-positive Neuro2a cells or primary culture neurons.

**Identification of BP-Incorporated IP<sub>3</sub>R1 in HeLa and SH-SY5Y Cells.** SH-SY5Y cells were trypsinized, evenly suspended, and then counted using trypan blue staining. The SH-SY5Y cells were then seeded at a density of 0.3  $\times$  10<sup>6</sup> in 10-cm dishes and cultivated for 6 additional days in culture medium containing 20  $\mu$ M RA or DMSO, which was replaced every 2 d. We also seeded HeLa cells in 10-cm dishes. We added 2 mM of BP to the medium 24 h before harvesting with cell scrapers. The cells were centrifuged and washed with PBS by centrifugation. The resulting cell precipitate was rapidly frozen in liquid nitrogen and stored at –80 °C. Frozen cells in Eppendorf tubes were treated with 0.5 mL Hepes buffer containing 1% Triton X-100 (HE-T), suspended, and rotated for 30 min at 4 °C. After centrifugation for 15 min at 20,000  $\times$  g at 4 °C in a MX-300 centrifuge (Tomy), the supernatant was mixed with pep6-Ab (7) bound to Protein A–Sepharose 4B and incubated for 2 h at 4 °C. The Sepharose beads were washed with 0.5 mL HE-T buffer three times and were then subjected to SDS/PAGE. Immunoprecipitated IP<sub>3</sub>R1 was separated on a 5% (wt/vol) gel, transferred to a PVDF membrane, and incubated with avidin–HRP (1:2,000 dilution, GE Healthcare). The biotin–avidin complex was detected using ECL kits.

- Jana NR, Zemskov EA, Wang Gh, Nukina N (2001) Altered proteasomal function due to the expression of polyglutamine-expanded truncated N-terminal huntingtin induces apoptosis by caspase activation through mitochondrial cytochrome c release. *Hum Mol Genet* 10(10):1049–1059.
- Kimura S, Fujita N, Noda T, Yoshimori T (2009) Monitoring autophagy in mammalian cultured cells through the dynamics of LC3. *Methods Enzymol* 452:1–12.
- Folk JE, Cole PW (1966) Mechanism of action of guinea pig liver transglutaminase. I. Purification and properties of the enzyme: Identification of a functional cysteine essential for activity. *J Biol Chem* 241(23):5518–5525.
- Lorand L, Lockridge OM, Campbell LK, Myhrman R, Bruner-Lorand J (1971) Transamidating enzymes. II. A continuous fluorescent method suited for automating measurements of factor XIII in plasma. *Anal Biochem* 44(1):221–231.
- Nakamura K, et al. (2013) Distinct roles of M1 and M3 muscarinic acetylcholine receptors controlling oscillatory and non-oscillatory [Ca<sup>2+</sup>]<sub>i</sub> increase. *Cell Calcium* 54(2):111–119.
- Higo T, et al. (2010) Mechanism of ER stress-induced brain damage by IP(3) receptor. *Neuron* 68(5):865–878.
- Nakade S, Rhee SK, Hamanaka H, Mikoshiba K (1994) Cyclic AMP-dependent phosphorylation of an immunopurified homotetrameric inositol 1,4,5-trisphosphate receptor (type I) increases Ca<sup>2+</sup> flux in reconstituted lipid vesicles. *J Biol Chem* 269(9):6735–6742.

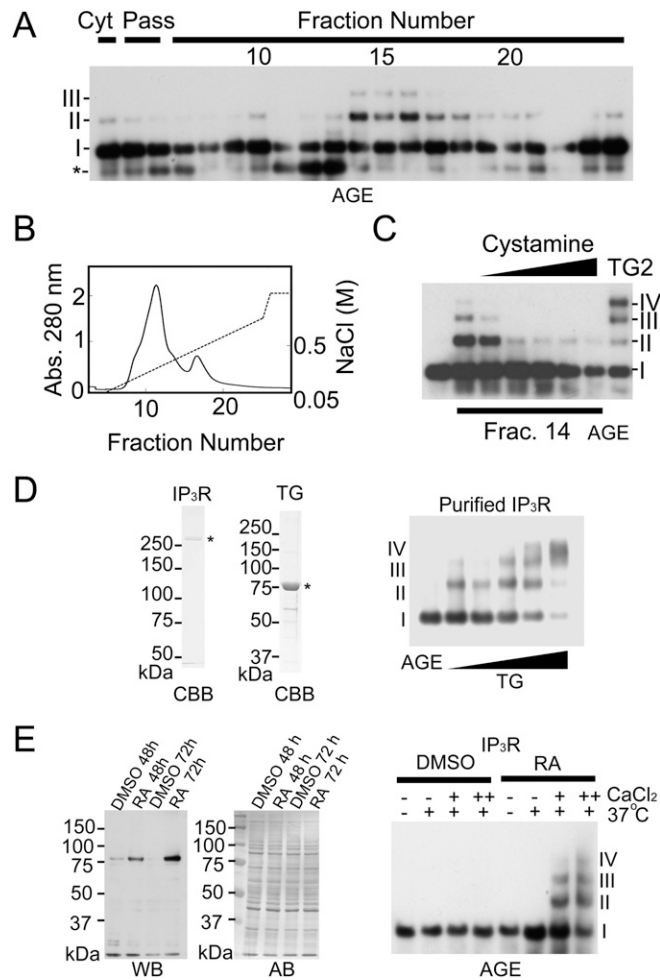

**Fig. S1.** TG2 covalently modifies IP<sub>3</sub>R1. (A) The cross-linked subunits (I–IV) on AGE were judged by thyroglobulin monomer (335 kDa) and dimer (670 kDa). Each eluate, cytosol (Cyt), or pass-through (pass) on an anion exchange chromatography was incubated with cerebellar P2/P3 membranes. An asterisk is a fragment of IP<sub>3</sub>R1 cleaved by Ca<sup>2+</sup>-dependent enzymes. (B) Chromatogram of brain lysates on an anion exchange column. (C) A peak fraction (no. 14) on the anion exchange chromatography or purified TG2 was incubated with cerebellar P2/P3 fractions in the absence or presence of cystamine (2, 4, 10, 20, and 40 mM). (D) Coomassie brilliant blue (CBB) staining shows purified IP<sub>3</sub>R1 or TG2 (asterisk). The AGE gel shows that purified TG2 directly cross-links IP<sub>3</sub>R1. (E) Cross-linking activity of HeLa cells pretreated with DMSO or RA. WBs with  $\alpha$ TG2 and amido black (AB) stains show cellular levels of TG2 and total proteins, respectively. Shown in *Right* is the result of Ca<sup>2+</sup>-dependent cross-linking activity using AGE.

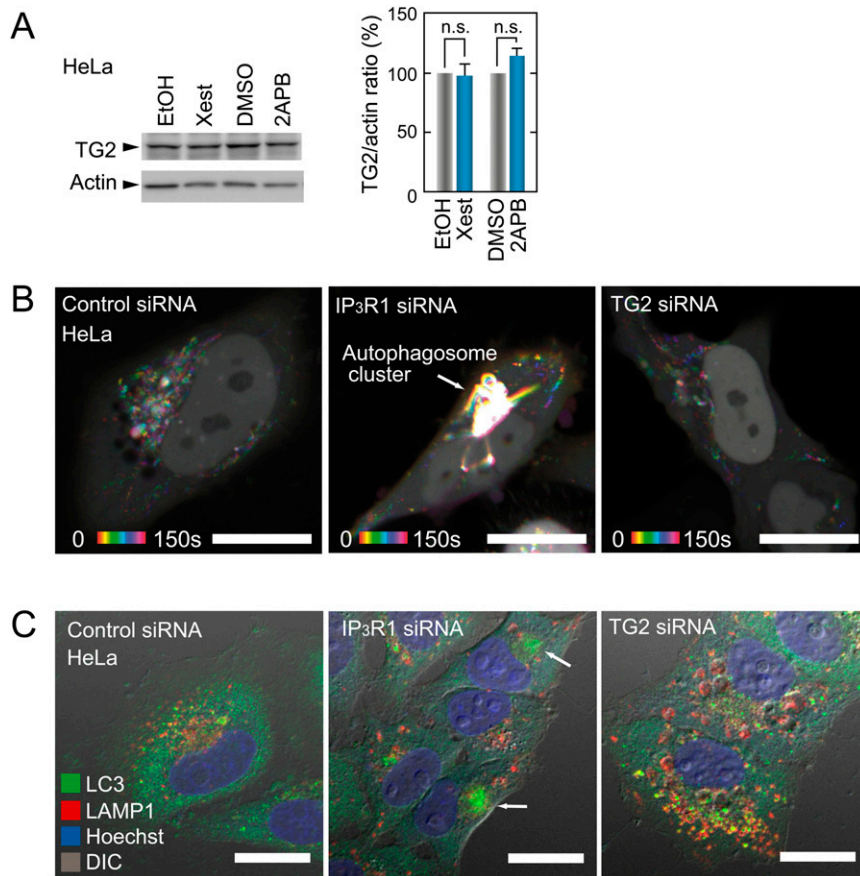

**Fig. S2.** TG2 negatively regulates IP<sub>3</sub>R1-mediated autophagy processes. (A) Expression levels of TG2 in HeLa cells were evaluated by Western blotting with  $\alpha$ TG2 and  $\alpha$ actin. We added 1  $\mu$ L of ethanol (EtOH), 2 mM xest in EtOH, DMSO, or 100 mM 2-APB in DMSO to 1 mL of culture medium and cultivated HeLa cells for an additional 42 h under the same condition as Fig. 3A. Left gels show representative results of Western blotting, and a bar graph summarizes the mean + SEM of TG2 contents in HeLa cells from three culture wells. Effects of these inhibitors were not statistically significant (n.s.).  $P = 0.78$  (xest),  $P = 0.27$  (2-APB). (B) Autophagosome dynamics upon IP<sub>3</sub>R1 or TG2 knockdown. Color-coded time-lapse images indicate that loss of IP<sub>3</sub>R1 results in large autophagosome clusters (white arrow). (C) Endogenous autophagosomes and lysosomes in HeLa cells transfected with control, IP<sub>3</sub>R1, or TG2 siRNA. White arrows indicate the clustered autophagosomes in the image merged with LC3 (green), LAMP1 (red), nuclear stain (blue), and transmitted light DIC (gray).

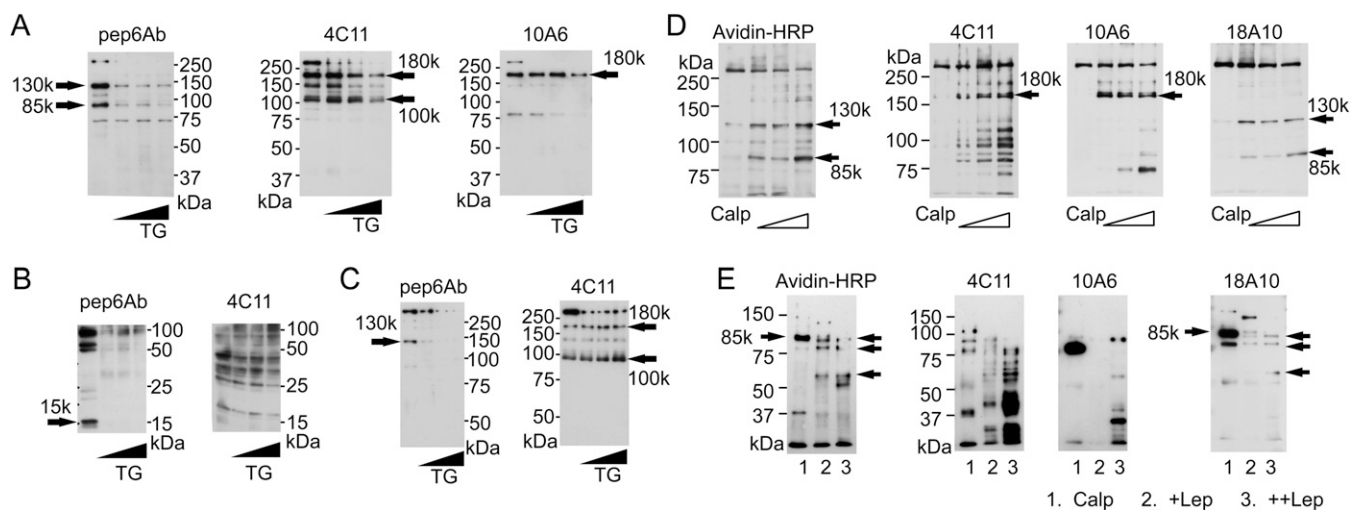

**Fig. S3.** Cross-linking sites were localized in C-terminal fragments generated by calpain or Lep digestion. The cerebellar IP<sub>3</sub>R1 was cross-linked by TG2 (0, 5, 10, and 20  $\mu$ g/mL) and then digested by 50  $\mu$ g/mL Calp (A) or 1  $\mu$ g/mL Lep (B). In C, the cerebellar IP<sub>3</sub>R1 was digested by 50  $\mu$ g/mL Calp and then cross-linked by TG2 (0, 5, 10, and 20  $\mu$ g/mL). Purified IP<sub>3</sub>R1 that was incorporated with BP was digested by various concentrations of calpain (Calp) in D and E or lysyl-endopeptidase (Lep) in E. Resultant fragments were detected with avidin-HRP, 4C11, 10A6, or 18A10. Arrows indicate major fragments.

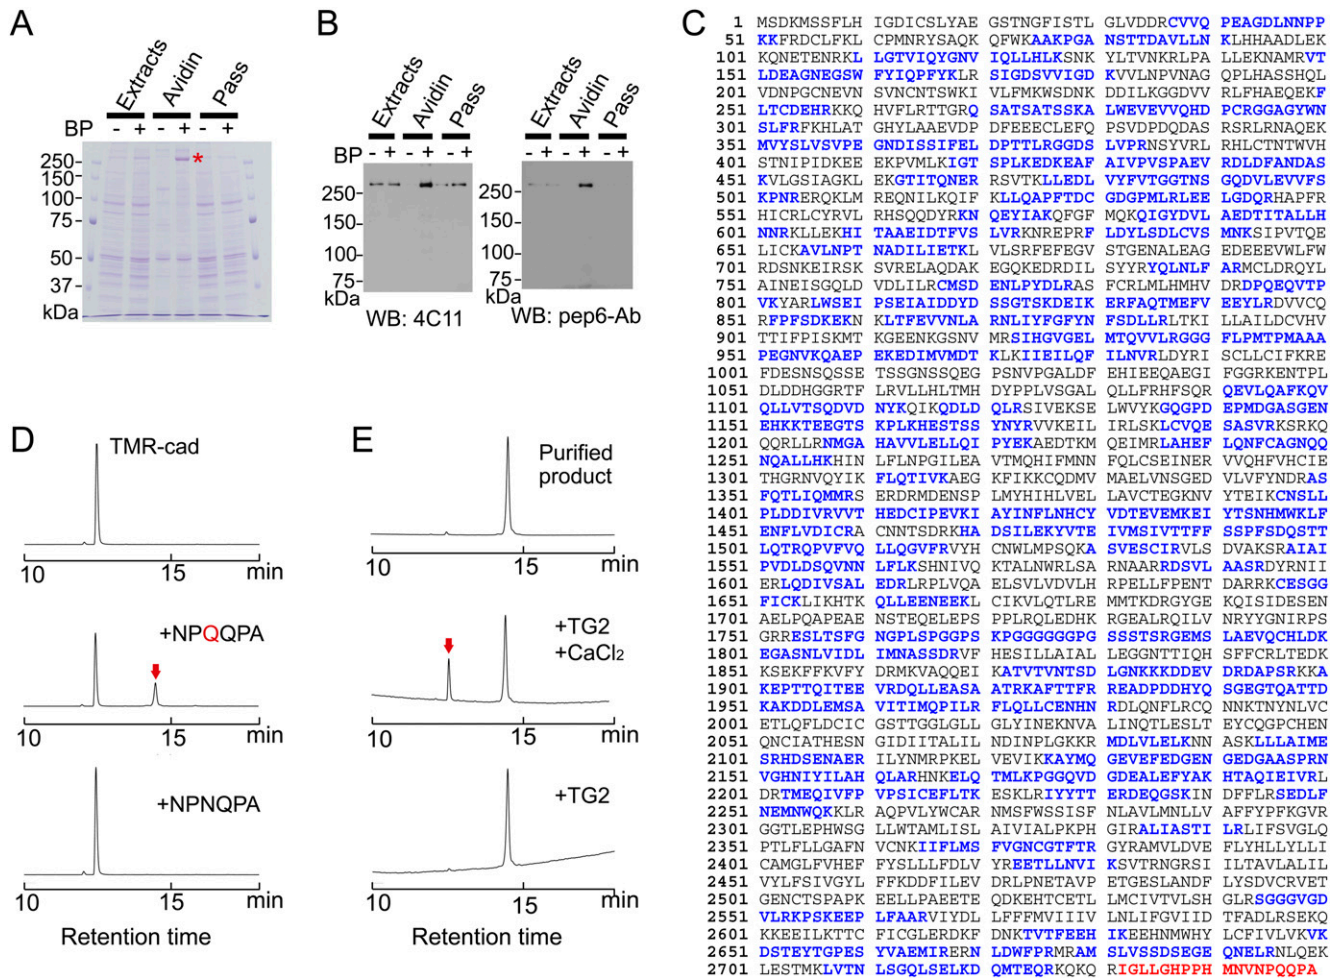

**Fig. 54.** TG2 modifies the C terminus of IP<sub>3</sub>R1. (A) Pull-down of TG2 substrates from the mouse cerebellum. The asterisk indicates a major band stained with CBB, which was identified as IP<sub>3</sub>R1 by mass spectrometry and WB in B. (C) Identification of IP<sub>3</sub>R1 and its biotinylated site using mass spectrometry. Peptides, identified as mouse IP<sub>3</sub>R1, are shown in blue, and a biotinylated peptide is in red bold. The shown data are a representative result from two independent experiments that consistently revealed that the C-terminal peptide consisting of 18 amino acids (in red) was exclusively modified by TG2. Sequence coverage was reproducibly 45–48%. (D) Gln2746 is sufficient for isopeptide formation and hydrolysis by TG2. The panels show the peaks of rhodamine-labeled cadaverine (TMR-cad) and a product of the TG2-catalyzed reaction of TMR-cad and the NPQQPA peptide (red arrow). (E) Top shows the purified product, and Middle shows a hydrolyzed product (red arrow) by TG2 and CaCl<sub>2</sub>.

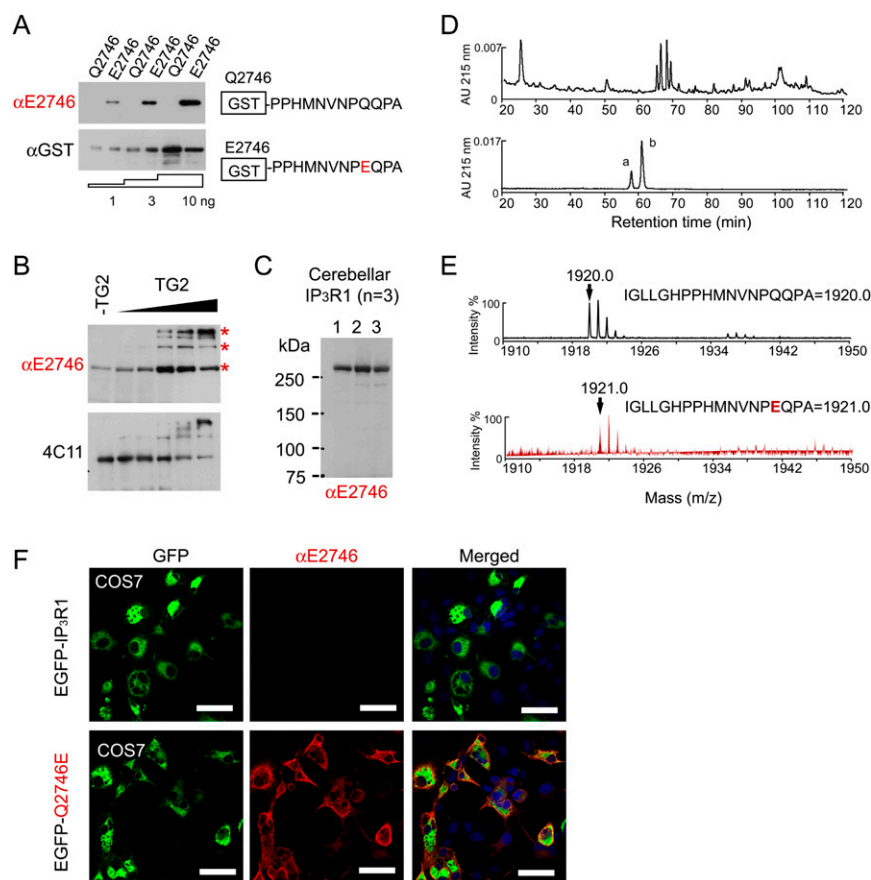

**Fig. S5.** Specificity of our developed antibody that recognizes Gln2746 modification. (A) The scheme indicates GST fusions of the control (Q2746) or a mutant with Gln2746 to glutamate substitution (E2746). The blotted Q2746 or E2746 proteins were detected with  $\alpha$ E2746 and  $\alpha$ GST antibodies. (B) Enzymatic deamidation of Q2746 in vitro. Mouse cerebellar IP<sub>3</sub>R1 was pretreated with TG2 for 90 min and detected using  $\alpha$ E2746 and 4C11. (C) Deamidated IP<sub>3</sub>R1 in brain samples. Gel showing the results obtained from three mice (lanes 1–3). (D) Separation of the deamidated peptide by reversed-phase chromatography. *Upper* and *Lower* show chromatograms of trypsin-digested IP<sub>3</sub>R1 and the synthetic control (peak a) or the deamidated peptide (peak b), respectively. (E) Identification of deamidated IP<sub>3</sub>R1 by mass spectrometry. *Upper* and *Lower* represent the mass spectra of nonmodified (black line) and deamidated (red line) peptides, respectively, of IP<sub>3</sub>R1 purified from mouse brains. Note that a 1.0-Da shift in mass spectrum is clearly detected. (F) EGFP–IP<sub>3</sub>R1- or EGFP–Q2746E-expressing COS-7 cells were fixed and stained with  $\alpha$ E2746 antibody and Heochst 33342. Fluorescence of EGFP,  $\alpha$ E2746/ $\alpha$ rabbit Alexa594, and Heochst 33342 was presented in green, red, and blue, respectively. Bars in rows indicate 50  $\mu$ m. The EGFP–IP<sub>3</sub>R1 or EGFP–Q2746E plasmids were transfected to COS-7 cells using FuGENE (Promega).

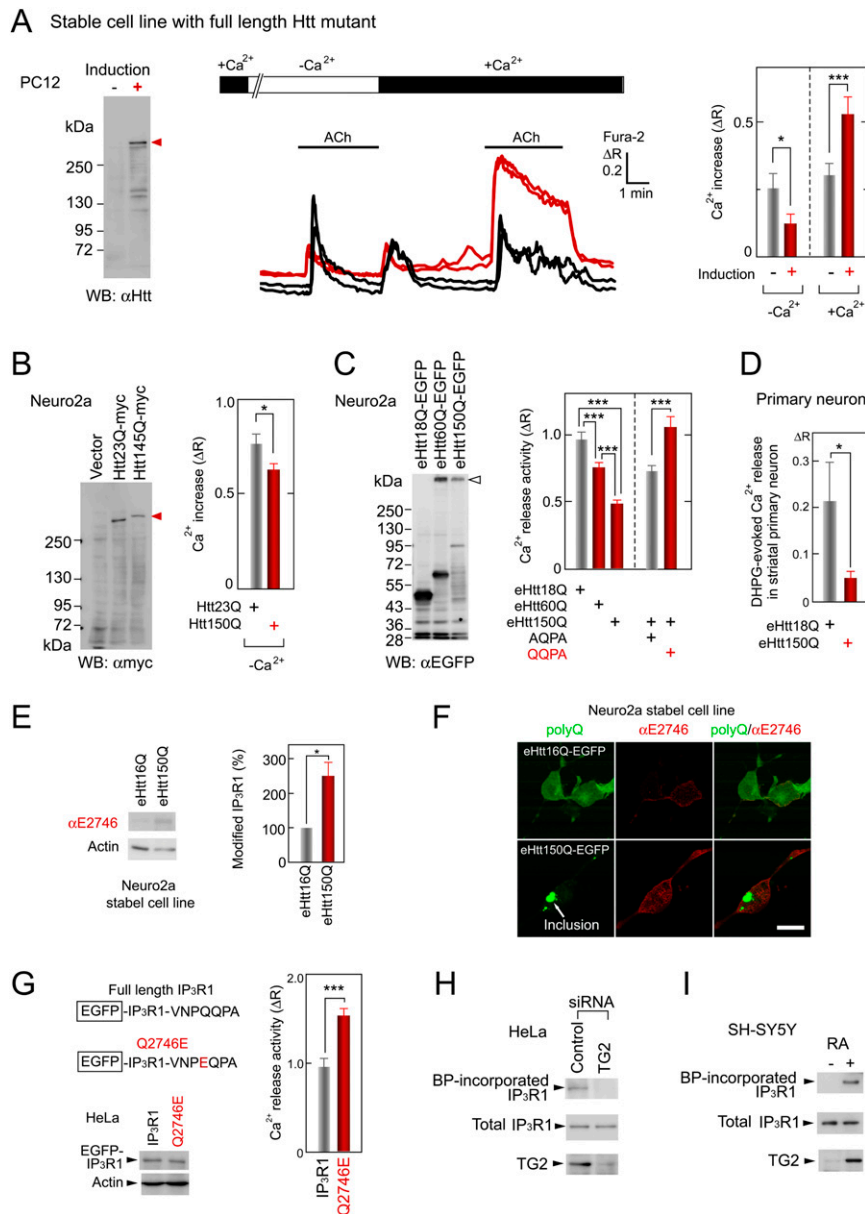

**Fig. S6.** Functional and structural modifications of IP<sub>3</sub>R in living cells. (A) A left gel shows the mutant Htt expression in PC12 cells (red arrow head), as detected by WB with the αHtt. We added EtOH instead of pon A to control cells. The representative traces of the fura-2 ratio are shown in black (control) and red (induction). Bar chart summarizes the mean + SEM of ΔR peak amplitudes in response to 100 μM ACh in nominally Ca<sup>2+</sup>-free BSS (no induction, *n* = 21; induction, *n* = 17) or 2 mM Ca<sup>2+</sup> BSS (no induction, *n* = 15; induction, *n* = 14). The peak amplitude (ΔR) was calculated by subtracting an average of the fura-2 ratio for 1 min before ACh stimulation from a peak of the fura-2 ratio during the stimulation. \**P* = 0.045, \*\*\**P* = 0.0040. (B) The left gel shows Htt proteins in Neuro2a cells transfected with a vector (pcDNA3.1zeo), full-length Htt23Q-, or Htt145Q-myc. Bradykinin (BK)-evoked Ca<sup>2+</sup> release in Neuro2a cells transiently expressing full-length Htt23Q- or Htt145Q-myc. The bar charts represent the mean + SEM of peak amplitudes in response to 100 nM BK under a Ca<sup>2+</sup>-free condition (23Q, *n* = 68; 145Q, *n* = 68). The peak amplitude (ΔR) was calculated by subtraction of an average of the fura-2 ratio before ACh stimulation from a peak of the fura-2 ratio during the stimulation. \**P* = 0.022. (C) The transiently expressing Htt exon1 including polyglutamines, eHtt18Q-, eHtt60Q-, or eHtt150Q-EGFP in Neuro2a cells were confirmed by WB with αEGFP. An arrowhead indicates the gel top. The bar charts represent the mean + SEM of peak amplitudes (18Q, 60Q, 150Q, *n* = 105; AQA, QQA, *n* = 60). \*\*\**P* = 0.0045 (18Q vs. 60Q), \*\*\**P* = 1.3 × 10<sup>-12</sup> (18Q vs. 150Q), \*\*\**P* = 6 × 10<sup>-8</sup> (60Q vs. 150Q), \*\*\**P* = 0.00044 (AQA vs. QQA). *P* values after multiple comparisons were corrected by the Bonferroni method. As DsRed was fused with AQA or QQA, in the case of coexpression with eHtt150Q-EGFP, Ca<sup>2+</sup> release was observed in Neuro2a cells colabeled with EGFP and dsRed fluorescence. (D) Neurons were confirmed by responses to depolarization with 60 mM KCl. The bar chart represents the mean + SEM of Ca<sup>2+</sup> release induced by 100 μM DHPG in striatal primary neurons expressing eHtt18Q-EGFP (*n* = 6) or eHtt150Q-EGFP (*n* = 11). \**P* = 0.018. The bar charts represent the mean + SEM of peak amplitudes. (E) Modification of IP<sub>3</sub>R1 in Neuro2a stable cell lines. Endogenous IP<sub>3</sub>R1 in control (eHtt16Q induced by pon A) or HD model Neuro2a cells (eHtt150Q induced by pon A) was detected with the αE2746 antibody. Bar charts summarize the means + SEM of IP<sub>3</sub>R1 modification that are normalized by β-actin contents. \**P* = 0.022 (*n* = 3). (F) Effects of inducible eHtt16Q and eHtt150Q on Gln2746 in Neuro2a cells. Cells were transfected with the HA-tagged C terminus (100 amino acids) of IP<sub>3</sub>R1 to enhance αE2746 signals. (G) A scheme shows the wild-type and the Q2746E mutant, and their expression levels were confirmed by WB. Fura-2 ratio images of living HeLa cells expressing EGFP-IP<sub>3</sub>R1 or EGFP-Q2746E mutant were obtained under nominally Ca<sup>2+</sup>-free conditions. Bar chart summarizes the mean + SEM of ΔR peak amplitudes in response to 3 μM ATP (control IP<sub>3</sub>R1, *n* = 15; Q2746E, *n* = 22). \*\*\**P* = 0.00036. Total and BP-incorporated IP<sub>3</sub>R1s in HeLa (H) or SH-SY5Y (I) cells are detected by 4C11 and avidin-HRP, respectively. (I) Top shows a marked incorporation of BP within IP<sub>3</sub>R1 in SH-SY5Y cells differentiated by RA or not. Middle and Bottom show the amount of IP<sub>3</sub>R1 and TG2. Each lane was loaded with 3 μg of protein.
